# Supplementary material for: miR-143-3p Inhibits Aberrant Tau Phosphorylation and Amyloidogenic Processing of APP by Directly Targeting DAPK1 in Alzheimer’s Disease
Source: MDPI journal article supplement (doi:10.3390/ijms23147992), 2022-07-20
Supplement: s1 [file s1]

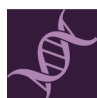

Article

# MiR-143-3p Inhibits Aberrant Tau Phosphorylation and Amyloidogenic Processing of APP by Directly Targeting DAPK1 in Alzheimer's Disease

Long Wang †, Xindong Shui †, Yingxue Mei, Yongfang Xia, Guihua Lan, Li Hu, Mi Zhang, Chen-Ling Gan, Ru-omeng Li, Yuan Tian, Quling Wang, Xi Gu, Dongmei Chen, Tao Zhang and Tae Ho Lee \*

Fujian Key Laboratory of Translational Research in Cancer and Neurodegenerative Diseases, Institute for Translational Medicine, School of Basic Medical Sciences, Fujian Medical University, Fuzhou 350122, China

\* Correspondence: tlee0813@fjmu.edu.cn or leethres@hotmail.com; Tel.: +86-591-2286-2498

† These authors contributed equally to this work.

## Supplementary Materials

**Table S1. Primary antibodies used in this study.**

| Antibodies                     | Dilutions    | Source                    | Identifier    |
|--------------------------------|--------------|---------------------------|---------------|
| Mouse anti- $\beta$ -actin     | 1:40000 (WB) | Sigma                     | Cat# A5441    |
| Mouse anti-DAPK1               | 1:1000 (WB)  | Sigma                     | Cat# D2178    |
| Mouse anti-Tau                 | 1:500 (WB)   | Invitrogen                | Cat# AHB0042  |
| Rabbit anti-pT231-Tau          | 1:500 (WB)   | Abcam                     | Cat# ab151559 |
| Rabbit anti-pT231-Tau          | 1:200 (IF)   | Abcam                     | Cat# ab151559 |
| Rabbit anti-pS262-Tau          | 1:500 (WB)   | Invitrogen                | Cat# 44750G   |
| Rabbit anti-pS396-Tau          | 1:500 (WB)   | Anaspec                   | Cat# AS-54977 |
| Rabbit anti-APP                | 1:2000 (WB)  | Abcam                     | Cat# Ab32136  |
| Rabbit anti-pT668-APP          | 1:500 (WB)   | Cell Signaling Technology | Cat# 6986     |
| Rabbit anti-Tuj1               | 1:200 (IF)   | Beyotime                  | Cat# AT809    |
| Rabbit anti- $\alpha$ -Tubulin | 1:2000 (WB)  | Cell Signaling Technology | Cat# 2125S    |

Abbreviations: IF, immunofluorescence; WB, Western blotting.

**Table S2. Characteristics of postmortem AD patients and age-matched control human hippocampus samples.**

| No | NPDx   | Gender | Age | PMI (h) | B&B  | CERAD |
|----|--------|--------|-----|---------|------|-------|
| 1  | Normal | F      | 83  | 29.40   | I    | A     |
| 2  | Normal | F      | 79  | 17.58   | I    | A     |
| 3  | Normal | F      | 66  | 25.00   | I    | A     |
| 4  | Normal | F      | 73  | 20.00   | I    | A     |
| 5  | Normal | F      | 77  | <12.00  | III  | B     |
| 6  | AD     | F      | 80  | 22.00   | VI   | C     |
| 7  | AD     | F      | 80  | 10.00   | V    | C     |
| 8  | AD     | F      | 55  | 48.00   | V-VI | C     |
| 9  | AD     | F      | 92  | 24.00   | VI   | C     |
| 10 | AD     | F      | 82  | 16.83   | VI   | C     |
| 11 | AD     | F      | 87  | 29.58   | VI   | C     |

Abbreviations: B&B (out of VI), Braak and Braak stage of AD; CERAD, Consortium to Establish a Registry for Alzheimer's disease;

F, female; NPDx, neuropsychological diagnosis; PMI, postmortem interval.

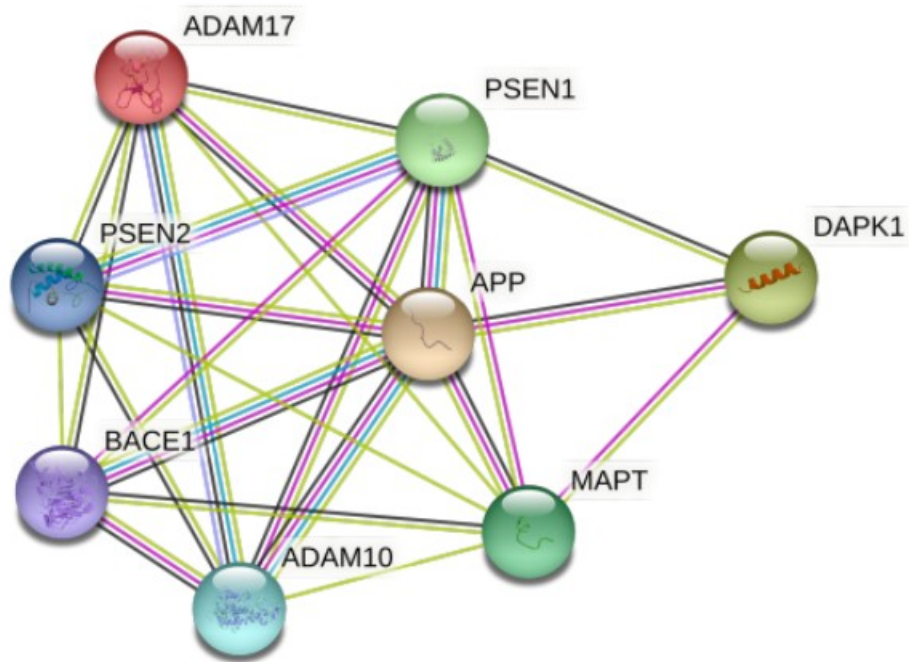

Figure S1. Protein-protein interaction network comprising DAPK1, tau (MAPT), APP, PSEN1, PSEN2, ADAM10, ADAM17, and BACE1 associated with Alzheimer's disease using the STRING database (<http://string-db.org>).
